# Supplementary material for: Cyclic AMP Affects Oocyte Maturation and Embryo Development in Prepubertal and Adult Cattle
Source: PLoS One. 2016 Feb 29;11(2):e0150264. doi: 10.1371/journal.pone.0150264 (PMC4771806; doi:10.1371/journal.pone.0150264)
Supplement: S3 Table — (DOCX) [file pone.0150264.s008.docx]

**S3 Table. Progression through meiosis of oocytes retrieved from adult and prepubescent donors and treated pre and during IVM with and without cAMP modulators.**

| Donors | Treatment | Time after IVM (h) | Oocyte stage | | | | | | | | | | Total  (n) |
| --- | --- | --- | --- | --- | --- | --- | --- | --- | --- | --- | --- | --- | --- |
| GV (n) | GV (%) | GVBD (n) | GVBD (%) | MI (n) | MI (%) | MII (n) | MII (%) | Not evaluable (n) | Not  evaluable (%) |
| Prepubertal | cAMP30 | 9 | 47 | 68.1x | 20 | 29.0 | 1 | 1.4x | 0 | 0.0 | 1 | 1.4 | 69 |
| Prepubertal | DMSO30 | 9 | 15 | 21.7y | 23 | 33.3 | 30 | 43.5y | 1 | 1.4 | 0 | 0.0 | 69 |
| Prepubertal | TCM24 | 9 | 29 | 46.0z | 17 | 27.0 | 17 | 27.0z | 0 | 0.0 | 0 | 0.0 | 63 |
| Adult | cAMP30 | 9 | 35 | 55.6a | 28 | 44.4a | 0 | 0.0a | 0 | 0.0 | 0 | 0.0 | 63 |
| Adult | DMSO30 | 9 | 21 | 31.3b | 25 | 37.3b | 17 | 25.4b | 2 | 3.0 | 2 | 3.0 | 67 |
| Adult | TCM24 | 9 | 25 | 46.3c | 20 | 37.0b | 9 | 16.7b | 0 | 0.0 | 0 | 0.0 | 54 |
| Prepubertal | cAMP30 | 20 | 7 | 9.9x | 16 | 22.5x | 36 | 50.7x | 11 | 15.5x | 1 | 1.4 | 71 |
| Prepubertal | DMSO30 | 20 | 2 | 2.7y | 3 | 4.1y | 22 | 30.1y | 44 | 60.3y | 2 | 2.7 | 73 |
| Prepubertal | TCM24 | 20 | 2 | 2.9z | 5 | 7.2y | 20 | 29.0y | 41 | 59.4y | 1 | 1.4 | 69 |
| Adult | cAMP30 | 20 | 7 | 10.6a | 15 | 22.7a | 36 | 54.5a | 6 | 9.1a | 2 | 3.0 | 66 |
| Adult | DMSO30 | 20 | 1 | 1.4b | 0 | 0.0b | 17 | 24.6b | 50 | 72.5b | 1 | 1.4 | 69 |
| Adult | TCM24 | 20 | 0 | 0.0b | 2 | 3.4b | 18 | 30.5b | 37 | 62.7b | 2 | 3.4 | 59 |
| Prepubertal | cAMP30 | 30 | 0 | 0.0 | 7 | 10.8x | 15 | 23.1x | 41 | 63.1x | 2 | 3.1 | 65 |
| Prepubertal | DMSO30 | 30 | 2 | 2.6 | 0 | 0.0y | 9 | 11.5y | 65 | 83.3y | 2 | 2.6 | 78 |
| Prepubertal | TCM24 | 24 | 0 | 0.0 | 1 | 1.7y | 5 | 8.5y | 52 | 88.1y | 1 | 1.7 | 59 |
| Adult | cAMP30 | 30 | 0 | 0.0 | 4 | 6.5 | 1 | 1.6a | 57 | 91.9a | 0 | 0.0 | 62 |
| Adult | DMSO30 | 30 | 0 | 0.0 | 2 | 2.7 | 5 | 6.8ab | 66 | 89.2a | 1 | 1.4 | 74 |
| Adult | TCM24 | 24 | 0 | 0.0 | 2 | 3.6 | 7 | 12.5b | 44 | 78.6b | 3 | 5.4 | 56 |

Data are the total number of oocytes per treatment per fixation time from four replicates; *P* < 0.016. GV, germinal vesicle stage; GVBD, germinal vesicle breakdown; MI, metaphase I; MII, metaphase II. Values with different superscripts differ significantly for the respective IVM time for prepubertal (x, y, z) and adult donors (a, b, c).
